# Supplementary material for: Accurate Diagnosis of Small Ruminant Lentivirus Infection Is Needed for Selection of Resistant Sheep through TMEM154 E35K Genotyping
Source: Pathogens. 2021 Jan 19;10(1):83. doi: 10.3390/pathogens10010083 (PMC7835874; doi:10.3390/pathogens10010083)
Supplement: Supplementary file 1 [file pathogens-10-00083-s001.xlsx]

## Sheet: Table S1
TEST		Raza Navarra										Latxa Navarra										Assaf																				Churra
		Flock 1					Flock 2					Flock 4					Flock 5					Flock 3					Flock 6					Flock 7					Flock 8					Flock 10					Flock 11
		n	Positive		Efficiency (%)		n	Positive		Efficiency (%)		n	Positive		Efficiency (%)		n	Positive		Efficiency (%)		n	Positive		Efficiency (%)		n	Positive		Efficiency (%)		n	Positive		Efficiency (%)		n	Positive		Efficiency (%)		n	Positive		Efficiency (%)		n	Positive
			n	%				n	%				n	%				n	%				n	%				n	%				n	%				n	%				n	%				n	%
ELISA#1		76	17	22.4	58.6		38	12	31.6	52.2		108	60	55.6	83.3		87	16	18.39	51.6		24	24	100	100.0		18	13	72.2	76.5		12	9	75	81.8		20	20	100	100.0		10	2	20	50.0		10	4	40
ELISA#2		76	7	9.2	24.1		38	21	55.6	91.3		108	57	52.8	79.2		87	3	3.45	9.7		24	16	66.7	66.7		18	16	88.9	94.1		12	9	75	81.8		20	20	100	100.0		10	2	20	50.0		10	4	40
ELISA#3		76	16	21.1	55.2		38	4	10.5	17.4		108	48	44.4	66.7		87	12	13.79	38.7		24	1	4.2	4.2		18	14	77.8	82.4		12	11	91.7	100.0		20	20	100	100.0		10	4	40	100.0		10	5	50
Total Elisa		76	29	38.2			38	23	60.5			108	72	66.7			87	31	35.6			24	24	100			18	17	94.4			12	11	91.7			20	20	100			10	4	40			10	6	60
[truncated: 33 more columns]

## Sheet: Table S2
TEST		Raza Navarra										Latxa Navarra										Assaf																				Churra
		Flock 1					Flock 2					Flock 4					Flock 5					Flock 3					Flock 6					Flock 7					Flock 8					Flock 10					Flock 11
		n	Positive		Efficiency (%)		n	Positive		Efficiency (%)		n	Positive		Efficiency (%)		n	Positive		Efficiency (%)		n	Positive		Efficiency (%)		n	Positive		Efficiency (%)		n	Positive		Efficiency (%)		n	Positive		Efficiency (%)		n	Positive		Efficiency (%)		n	Positive
			n	%				n	%				n	%				n	%				n	%				n	%				n	%				n	%				n	%				n	%
qPCR		75	28	37.3	56.0		36	5	13.9	21.7		107	48	44.9	60.0		84	42	50.0	73.7		24	23	85.8	95.8		18	8	44.4	50.0		12	7	58.3	58.3		20	19	95.0	95.0		6	0	0.0	0.0		6	2	33.3
Total Infected		75	50	66.7			36	23	63.9			107	80	74.8			84	57	67.9			24	24	100.0			18	16	88.9			12	12	100.0			20	20	100.0			6	3	50.0			6	4	66.7
[truncated: 33 more columns]

## Sheet: Table S3
Flock	Sample	ELISA#1	ELISA#2	ELISA#3	Total Elisa
1	1	Negative	Negative	Negative	Negative
1	4	Negative	Negative	Negative	Negative
1	7	Negative	Negative	Negative	Negative
1	24	Positive	Negative	Negative	Positive
1	35	Positive	Positive	Negative	Positive
1	66	Negative	Positive	Negative	Positive
1	67	Negative	Negative	Negative	Negative
1	68	Negative	Negative	Negative	Negative
1	75	Negative	Negative	Positive	Positive
1	76	Negative	Negative	Negative	Negative
1	77	Negative	Negative	Negative	Negative
1	79	Negative	Negative	Negative	Negative
1	80	Negative	Negative	Negative	Negative
1	82	Negative	Negative	Negative	Negative
1	83	Negative	Negative	Negative	Negative
1	84	Negative	Negative	Negative	Negative
1	85	Positive	Negative	Negative	Positive
1	86	Negative	Negative	Negative	Negative
1	87	Negative	Negative	Negative	Negative
1	88	Negative	Negative	Negative	Negative
1	89	Negative	Negative	Negative	Negative
1	90	Negative	Negative	Negative	Negative
1	91	Negative	Negative	Negative	Negative
1	92	Negative	Negative	Negative	Negative
1	93	Negative	Negative	Negative	Negative
1	94	Negative	Negative	Negative	Negative
1	95	Negative	Negative	Negative	Negative
1	96	Negative	Negative	Negative	Negative
1	97	Negative	Negative	Negative	Negative
1	98	Negative	Negative	Negative	Negative
1	99	Negative	Negative	Negative	Negative
1	100	Negative	Negative	Negative	Negative
1	101	Negative	Negative	Negative	Negative
1	104	Negative	Negative	Negative	Negative
1	105	Positive	Negative	Negative	Positive
1	106	Negative	Negative	Negative	Negative
1	107	Negative	Negative	Negative	Negative
1	108	Positive	Negative	Negative	Positive
1	113	Negative	Negative	Positive	Positive
1	114	Negative	Negative	Positive	Positive
1	118	Positive	Negative	Positive	Positive
1	119	Negative	Negative	Negative	Negative
1	120	Negative	Negative	Negative	Negative
1	121	Positive	Negative	Negative	Positive
1	130	Positive	Positive	Negative	Positive
1	138	Negative	Negative	Positive	Negative
1	141	Negative	Negative	Negative	Negative
1	146	Negative	Negative	Positive	Negative
1	163	Negative	Negative	Negative	Negative
1	164	Negative	Negative	Negative	Negative
1	165	Negative	Negative	Negative	Negative
1	166	Positive	Positive	Negative	Positive
1	167	Negative	Negative	Positive	Positive
1	168	Negative	Negative	Negative	Negative
1	171	Negative	Negative	Negative	Negative
1	172	Negative	Negative	Positive	Positive
1	183	Positive	Negative	Negative	Positive
1	187	Positive	Negative	Negative	Positive
1	196	Negative	Negative	Positive	Positive
1	197	Negative	Negative	Positive	Positive
1	210	Positive	Positive	Positive	Positive
1	212	Positive	Positive	Positive	Positive
1	216	Positive	Positive	Negative	Positive
1	217	Positive	Negative	Negative	Positive
1	218	Negative	Negative	Negative	Negative
1	219	Negative	Negative	Negative	Negative
1	220	Negative	Negative	Positive	Positive
1	227	Positive	Negative	Negative	Positive
1	228	Negative	Negative	Negative	Negative
1	229	Negative	Negative	Positive	Positive
1	230	Negative	Negative	Negative	Negative
1	231	Negative	Negative	Positive	Positive
1	232	Positive	Negative	Negative	Positive
1	233	Negative	Negative	Negative	Negative
1	234	Negative	Negative	Negative	Negative
1	237	Negative	Negative	Positive	Positive
2	1	Negative	Negative	Negative	Negative
2	2	Negative	Negative	Negative	Negative
2	3	Negative	Positive	Negative	Positive
2	4	Positive	Positive	Negative	Positive
2	5	Negative	Negative	Negative	Negative
2	6	Negative	Positive	Negative	Positive
2	7	Negative	Positive	Negative	Positive
2	8	Negative	Negative	Negative	Negative
2	9	Negative	Negative	Negative	Negative
2	10	Negative	Positive	Negative	Positive
2	11	Positive	Negative	Negative	Positive
2	12	Positive	Positive	Positive	Positive
2	14	Negative	Negative	Negative	Negative
2	15	Negative	Negative	Negative	Negative
2	16	Positive	Positive	Negative	Positive
2	17	Positive	Positive	Negative	Positive
2	18	Positive	Positive	Negative	Positive
2	19	Positive	Positive	Negative	Positive
2	20	Negative	Negative	Negative	Negative
2	21	Negative	Negative	Negative	Negative
2	22	Negative	Negative	Negative	Negative
2	23	Negative	Positive	Negative	Positive
2	24	Negative	Positive	Negative	Positive
2	25	Positive	Positive	Negative	Positive
2	26	Negative	Positive	Negative	Positive
2	27	Negative	Positive	Negative	Positive
2	28	Negative	Positive	Negative	Positive
2	29	Negative	Positive	Negative	Positive
2	30	Negative	Positive	Negative	Positive
2	31	Negative	Negative	Negative	Negative
2	32	Positive	Negative	Negative	Positive
2	34	Negative	Negative	Negative	Negative
2	35	Negative	Negative	Negative	Negative
2	36	Positive	Positive	Positive	Positive
2	37	Negative	Negative	Negative	Negative
2	38	Positive	Positive	Positive	Positive
2	40	Positive	Positive	Positive	Positive
2	41	Negative	Negative	Negative	Negative
3	1	Positive	Positive	Negative	Positive
3	2	Positive	Positive	Negative	Positive
3	3	Positive	Positive	Negative	Positive
3	4	Positive	Positive	Negative	Positive
3	5	Positive	Positive	Negative	Positive
3	6	Positive	Positive	Negative	Positive
3	17	Positive	Positive	Negative	Positive
3	18	Positive	Positive	Negative	Positive
3	19	Positive	Positive	Negative	Positive
3	20	Positive	Positive	Positive	Positive
3	22	Positive	Positive	Negative	Positive
3	23	Positive	Positive	Negative	Positive
3	24	Positive	Positive	Negative	Positive
3	26	Positive	Positive	Negative	Positive
3	27	Positive	Negative	Negative	Positive
3	28	Positive	Positive	Negative	Positive
3	29	Positive	Negative	Negative	Positive
3	30	Positive	Negative	Negative	Positive
3	32	Positive	Negative	Negative	Positive
3	33	Positive	Negative	Negative	Positive
3	34	Positive	Negative	Negative	Positive
3	35	Positive	Negative	Negative	Positive
3	39	Positive	Negative	Negative	Positive
3	41	Positive	Positive	Negative	Positive
4	1	Negative	Negative	Negative	Negative
4	2	Positive	Negative	Negative	Positive
4	3	Positive	Positive	Positive	Positive
4	4	Negative	Negative	Negative	Negative
4	5	Negative	Negative	Negative	Negative
4	6	Negative	Negative	Negative	Negative
4	7	Negative	Negative	Negative	Negative
4	8	Negative	Negative	Negative	Negative
4	9	Negative	Negative	Negative	Negative
4	10	Negative	Negative	Negative	Negative
4	11	Positive	Positive	Negative	Positive
4	12	Negative	Negative	Negative	Negative
4	13	Negative	Negative	Negative	Negative
4	14	Negative	Negative	Negative	Negative
4	15	Negative	Negative	Negative	Negative
4	16	Negative	Negative	Negative	Negative
4	19	Positive	Positive	Positive	Positive
4	20	Negative	Negative	Negative	Negative
4	21	Negative	Negative	Negative	Negative
4	22	Negative	Negative	Negative	Negative
4	23	Negative	Negative	Negative	Negative
4	24	Negative	Negative	Negative	Negative
4	25	Positive	Positive	Positive	Positive
4	26	Negative	Negative	Negative	Negative
4	30	Positive	Positive	Negative	Positive
4	33	Positive	Positive	Positive	Positive
4	34	Negative	Negative	Negative	Negative
4	35	Negative	Positive	Positive	Positive
4	36	Negative	Negative	Negative	Negative
4	37	Negative	Positive	Positive	Positive
4	39	Negative	Negative	Positive	Positive
4	40	Negative	Negative	Negative	Negative
4	41	Negative	Negative	Negative	Negative
4	42	Positive	Positive	Positive	Positive
4	43	Positive	Positive	Positive	Positive
4	44	Negative	Negative	Positive	Positive
4	45	Negative	Negative	Positive	Positive
4	46	Negative	Negative	Negative	Negative
4	47	Positive	Positive	Positive	Positive
4	48	Negative	Negative	Positive	Positive
4	49	Negative	Negative	Negative	Negative
4	50	Negative	Negative	Negative	Negative
4	51	Positive	Negative	Negative	Positive
4	52	Negative	Negative	Negative	Negative
4	54	Positive	Positive	Positive	Positive
4	55	Positive	Positive	Positive	Positive
4	67	Positive	Positive	Positive	Positive
4	71	Positive	Positive	Negative	Positive
4	72	Negative	Negative	Negative	Negative
4	74	Positive	Negative	Negative	Positive
4	75	Positive	Positive	Positive	Positive
4	77	Negative	Negative	Negative	Negative
4	79	Positive	Positive	Positive	Positive
4	80	Positive	Positive	Positive	Positive
4	82	Positive	Positive	Positive	Positive
4	83	Positive	Positive	Negative	Positive
4	88	Positive	Positive	Negative	Positive
4	89	Positive	Positive	Negative	Positive
4	90	Positive	Positive	Positive	Positive
4	92	Negative	Negative	Negative	Negative
4	93	Positive	Positive	Positive	Positive
4	94	Positive	Positive	Positive	Positive
4	98	Positive	Positive	Negative	Positive
4	100	Positive	Negative	Negative	Positive
4	101	Positive	Positive	Positive	Positive
4	103	Negative	Negative	Negative	Negative
4	109	Positive	Positive	Negative	Positive
4	111	Negative	Negative	Negative	Negative
4	113	Positive	Positive	Positive	Positive
4	115	Positive	Positive	Positive	Positive
4	116	Positive	Positive	Negative	Positive
4	117	Positive	Negative	Negative	Positive
4	118	Positive	Positive	Positive	Positive
4	120	Positive	Positive	Positive	Positive
4	121	Negative	Negative	Negative	Negative
4	122	Positive	Positive	Positive	Positive
4	123	Positive	Positive	Negative	Positive
4	126	Negative	Negative	Negative	Negative
4	127	Positive	Positive	Positive	Positive
4	130	Positive	Positive	Negative	Positive
4	131	Positive	Positive	Negative	Positive
4	134	Positive	Positive	Positive	Positive
4	136	Positive	Positive	Negative	Positive
4	140	Positive	Positive	Negative	Positive
4	143	Positive	Positive	Positive	Positive
4	144	Positive	Positive	Positive	Positive
4	145	Negative	Positive	Negative	Positive
4	177	Negative	Negative	Negative	Negative
4	184	Negative	Negative	Negative	Negative
4	185	Negative	Negative	Positive	Positive
4	186	Positive	Positive	Negative	Positive
4	188	Positive	Negative	Negative	Positive
4	191	Positive	Positive	Positive	Positive
4	193	Positive	Positive	Positive	Positive
4	194	Negative	Positive	Positive	Positive
4	195	Positive	Negative	Positive	Positive
4	197	Positive	Positive	Positive	Positive
4	198	Positive	Positive	Positive	Positive
4	206	Negative	Negative	Positive	Positive
4	208	Negative	Negative	Positive	Positive
4	210	Positive	Positive	Positive	Positive
4	217	Positive	Positive	Positive	Positive
4	218	Positive	Positive	Positive	Positive
4	381	Positive	Positive	Positive	Positive
4	382	Positive	Positive	Positive	Positive
4	383	Negative	Negative	Positive	Positive
4	384	Positive	Positive	Negative	Positive
4	387	Positive	Positive	Negative	Positive
5	1	Positive	Negative	Negative	Positive
5	2	Negative	Negative	Negative	Negative
5	3	Negative	Negative	Negative	Negative
5	4	Negative	Negative	Negative	Negative
5	5	Negative	Negative	Negative	Negative
5	6	Negative	Negative	Negative	Negative
5	14	Positive	Negative	Negative	Positive
5	15	Negative	Negative	Positive	Positive
5	17	Negative	Negative	Negative	Negative
5	19	Negative	Negative	Negative	Negative
5	20	Negative	Positive	Negative	Positive
5	22	Negative	Negative	Negative	Negative
5	23	Negative	Negative	Negative	Negative
5	24	Positive	Negative	Negative	Positive
5	25	Negative	Negative	Positive	Positive
5	27	Negative	Positive	Negative	Positive
5	30	Negative	Negative	Negative	Negative
5	31	Negative	Negative	Negative	Negative
5	32	Negative	Negative	Negative	Negative
5	33	Negative	Negative	Negative	Negative
5	34	Negative	Negative	Negative	Negative
5	35	Negative	Negative	Positive	Positive
5	39	Positive	Negative	Negative	Positive
5	41	Positive	Negative	Negative	Positive
5	45	Negative	Negative	Positive	Positive
5	46	Negative	Negative	Negative	Negative
5	53	Negative	Negative	Negative	Negative
5	54	Negative	Positive	Negative	Positive
5	55	Negative	Negative	Positive	Positive
5	57	Positive	Negative	Negative	Positive
5	60	Negative	Negative	Negative	Negative
5	61	Negative	Negative	Negative	Negative
5	62	Negative	Negative	Negative	Negative
5	63	Negative	Negative	Negative	Negative
5	65	Positive	Negative	Negative	Positive
5	67	Positive	Negative	Negative	Positive
5	77	Positive	Negative	Negative	Positive
5	83	Positive	Negative	Negative	Positive
5	84	Positive	Negative	Negative	Positive
5	87	Positive	Negative	Negative	Positive
5	90	Negative	Negative	Positive	Positive
5	92	Negative	Negative	Positive	Positive
5	94	Negative	Negative	Negative	Negative
5	95	Negative	Negative	Negative	Negative
5	96	Negative	Negative	Negative	Negative
5	97	Negative	Negative	Positive	Positive
5	98	Negative	Negative	Negative	Negative
5	101	Negative	Negative	Positive	Positive
5	104	Negative	Negative	Negative	Negative
5	105	Negative	Negative	Negative	Negative
5	106	Negative	Negative	Negative	Negative
5	107	Negative	Negative	Negative	Negative
5	108	Negative	Negative	Negative	Negative
5	109	Negative	Negative	Negative	Negative
5	110	Negative	Negative	Negative	Negative
5	111	Negative	Negative	Negative	Negative
5	112	Negative	Negative	Negative	Negative
5	113	Negative	Negative	Negative	Negative
5	114	Negative	Negative	Negative	Negative
5	115	Negative	Negative	Positive	Positive
5	120	Negative	Negative	Negative	Negative
5	121	Negative	Negative	Negative	Negative
5	122	Negative	Negative	Negative	Negative
5	123	Negative	Negative	Negative	Negative
5	124	Negative	Negative	Negative	Negative
5	125	Negative	Negative	Negative	Negative
5	126	Negative	Negative	Negative	Negative
5	127	Negative	Negative	Negative	Negative
5	128	Negative	Negative	Negative	Negative
5	129	Negative	Negative	Negative	Negative
5	131	Negative	Negative	Negative	Negative
5	133	Negative	Negative	Negative	Negative
5	134	Negative	Negative	Negative	Negative
5	135	Negative	Negative	Negative	Negative
5	136	Negative	Negative	Negative	Negative
5	137	Positive	Negative	Negative	Positive
5	138	Negative	Negative	Negative	Negative
5	139	Negative	Negative	Negative	Negative
5	140	Negative	Negative	Negative	Negative
5	141	Positive	Negative	Negative	Positive
5	155	Positive	Negative	Negative	Positive
5	157	Positive	Negative	Negative	Positive
5	159	Negative	Negative	Positive	Positive
5	160	Negative	Negative	Negative	Negative
5	220	Negative	Negative	Negative	Negative
5	223	Negative	Negative	Positive	Positive
5	224	Negative	Negative	Negative	Negative
6	1	Positive	Positive	Positive	Positive
6	2	Positive	Positive	Positive	Positive
6	3	Positive	Positive	Positive	Positive
6	4	Positive	Positive	Positive	Positive
6	5	Positive	Positive	Positive	Positive
6	6	Positive	Positive	Positive	Positive
6	7	Negative	Negative	Positive	Positive
6	8	Negative	Negative	Negative	Negative
6	9	Negative	Negative	Positive	Positive
6	10	Positive	Positive	Positive	Positive
6	11	Positive	Positive	Positive	Positive
6	12	Positive	Positive	Negative	Positive
6	13	Positive	Positive	Positive	Positive
6	14	Negative	Negative	Positive	Positive
6	15	Positive	Positive	Positive	Positive
6	16	Positive	Positive	Positive	Positive
6	17	Negative	Positive	Positive	Positive
6	18	Positive	Positive	Positive	Positive
7	19	Positive	Positive	Positive	Positive
7	20	Positive	Positive	Positive	Positive
7	21	Positive	Positive	Positive	Positive
7	22	Negative	Positive	Positive	Positive
7	23	Positive	Positive	Positive	Positive
7	24	Negative	Negative	Negative	Negative
7	25	Positive	Positive	Positive	Positive
7	26	Positive	Positive	Positive	Positive
7	27	Positive	Positive	Positive	Positive
7	28	Positive	Positive	Positive	Positive
7	29	Negative	Positive	Negative	Positive
7	30	Positive	Positive	Negative	Positive
8	31	Positive	Positive	Positive	Positive
8	32	Positive	Positive	Positive	Positive
8	33	Positive	Positive	Positive	Positive
8	34	Positive	Positive	Positive	Positive
8	35	Positive	Positive	Positive	Positive
8	36	Positive	Positive	Positive	Positive
8	37	Positive	Positive	Positive	Positive
8	38	Positive	Positive	Positive	Positive
8	39	Positive	Positive	Positive	Positive
8	40	Positive	Positive	Positive	Positive
8	41	Positive	Positive	Positive	Positive
8	42	Positive	Positive	Positive	Positive
8	43	Positive	Positive	Positive	Positive
8	44	Positive	Positive	Positive	Positive
8	45	Positive	Positive	Positive	Positive
8	46	Positive	Positive	Positive	Positive
8	47	Positive	Positive	Positive	Positive
8	48	Positive	Positive	Positive	Positive
8	49	Positive	Positive	Positive	Positive
8	50	Positive	Positive	Positive	Positive
9	1	Negative	Negative	Negative	Negative
9	2	Negative	Negative	Negative	Negative
9	3	Negative	Negative	Negative	Negative
9	4	Negative	Negative	Negative	Negative
9	5	Negative	Negative	Negative	Negative
9	6	Negative	Negative	Negative	Negative
9	7	Negative	Negative	Negative	Negative
9	8	Negative	Negative	Positive	Positive
9	9	Negative	Negative	Negative	Negative
9	10	Negative	Negative	Negative	Negative
9	11	Negative	Negative	Negative	Negative
9	12	Negative	Negative	Negative	Negative
9	13	Negative	Negative	Negative	Negative
9	15	Negative	Negative	Negative	Negative
9	16	Negative	Negative	Negative	Negative
9	17	Negative	Negative	Negative	Negative
9	18	Negative	Negative	Negative	Negative
9	19	Negative	Negative	Negative	Negative
9	20	Negative	Positive	Negative	Positive
9	21	Negative	Negative	Negative	Negative
9	22	Positive	Negative	Negative	Positive
9	23	Negative	Negative	Negative	Negative
9	24	Negative	Negative	Negative	Negative
9	25	Negative	Negative	Negative	Negative
9	26	Negative	Negative	Negative	Negative
9	27	Negative	Negative	Negative	Negative
9	28	Negative	Negative	Negative	Negative
9	29	Negative	Negative	Negative	Negative
9	30	Negative	Negative	Negative	Negative
9	31	Negative	Negative	Negative	Negative
9	32	Negative	Negative	Negative	Negative
9	33	Negative	Negative	Negative	Negative
9	34	Positive	Negative	Negative	Positive
9	35	Negative	Negative	Negative	Negative
9	36	Negative	Negative	Negative	Negative
9	37	Negative	Negative	Negative	Negative
9	38	Negative	Negative	Negative	Negative
9	39	Negative	Negative	Positive	Positive
9	40	Negative	Negative	Negative	Negative
9	41	Negative	Negative	Negative	Negative
9	42	Negative	Negative	Negative	Negative
9	43	Negative	Negative	Negative	Negative
9	44	Negative	Negative	Negative	Negative
10	12229	Negative	Negative	Negative	Negative
10	14483	Positive	Positive	Positive	Positive
10	15111	Negative	Negative	Negative	Negative
10	15306	Negative	Negative	Negative	Negative
10	6008	Negative	Negative	Negative	Negative
10	6022	Negative	Positive	Positive	Positive
10	6082	Negative	Negative	Negative	Negative
10	16197	Negative	Negative	Positive	Positive
10	16282	Negative	Negative	Negative	Negative
10	6430	Positive	Negative	Positive	Positive
11	12033	Negative	Positive	Negative	Positive
11	12341	Negative	Negative	Positive	Positive
11	14485	Negative	Negative	Negative	Negative
11	14557	Positive	Positive	Positive	Positive
11	14596	Negative	Negative	Negative	Negative
11	15913	Negative	Negative	Negative	Negative
11	15925	Positive	Positive	Positive	Positive
11	16077	Negative	Negative	Negative	Negative
11	16179	Positive	Negative	Positive	Positive
11	16252	Positive	Positive	Positive	Positive
12	11007	Negative	Negative	Positive	Positive
12	13038	Negative	Negative	Positive	Positive
12	13078	Positive	Positive	Positive	Positive
12	13125	Negative	Negative	Positive	Positive
12	13163	Negative	Negative	Negative	Negative
12	13184	Negative	Negative	Positive	Positive
12	14030	Negative	Negative	Negative	Negative
12	14081	Negative	Negative	Positive	Positive
12	14219	Negative	Negative	Negative	Negative
12	15082	Negative	Negative	Positive	Positive
13	11030	Positive	Positive	Positive	Positive
13	11070	Positive	Positive	Positive	Positive
13	14004	Positive	Positive	Positive	Positive
13	14045	Positive	Positive	Positive	Positive
13	14053	Positive	Positive	Positive	Positive
13	15015	Positive	Positive	Positive	Positive
13	15032	Negative	Positive	Positive	Positive
13	16020	Positive	Positive	Positive	Positive
13	16045	Positive	Positive	Positive	Positive
13	16044	Negative	Negative	Negative	Negative
14	428	Negative	Negative	Negative	Negative
14	431	Negative	Negative	Negative	Negative
14	444	Negative	Negative	Negative	Negative
14	375	Negative	Positive	Positive	Positive
14	433	Negative	Negative	Negative	Negative
14	391	Negative	Negative	Positive	Positive
14	471	Negative	Negative	Negative	Negative
14	458	Positive	Negative	Positive	Positive
14	424	Negative	Negative	Positive	Positive
14	425	Negative	Negative	Positive	Positive
15	1014	Positive	Negative	Negative	Positive
15	1057	Negative	Negative	Positive	Positive
15	13001	Negative	Negative	Positive	Positive
15	13012	Negative	Negative	Positive	Positive
15	13023	Negative	Negative	Negative	Negative
15	14005	Negative	Negative	Negative	Negative
15	14054	Positive	Positive	Positive	Positive
15	14063	Negative	Negative	Negative	Negative
15	14084	Negative	Positive	Positive	Positive
15	16036	Negative	Negative	Positive	Positive
16	9144	Negative	Negative	Negative	Negative
16	9089	Negative	Positive	Negative	Positive
16	9136	Negative	Negative	Negative	Negative
16	9138	Negative	Negative	Negative	Negative
16	9140	Negative	Negative	Negative	Negative
16	9141	Negative	Positive	Negative	Positive
16	9148	Negative	Positive	Positive	Positive
16	9150	Negative	Positive	Positive	Positive
17	2027	Positive	Positive	Positive	Positive
17	2043	Positive	Positive	Positive	Positive
17	2057	Positive	Positive	Positive	Positive
17	2190	Positive	Positive	Positive	Positive
17	3070	Positive	Positive	Positive	Positive
17	4031	Positive	Positive	Positive	Positive
17	4087	Positive	Positive	Positive	Positive
17	4117	Positive	Positive	Positive	Positive
17	5085	Positive	Positive	Positive	Positive
17	5139	Positive	Positive	Positive	Positive
17	3008	Positive	Positive	Positive	Positive
17	4058	Positive	Positive	Positive	Positive
17	5069	Positive	Positive	Positive	Positive
18	6	Negative	Negative	Negative	Negative
18	59	Negative	Negative	Positive	Positive
18	2037	Negative	Negative	Positive	Positive
18	2076	Negative	Negative	Negative	Negative
18	3066	Negative	Negative	Negative	Negative
18	3067	Negative	Positive	Positive	Positive
18	3072	Negative	Positive	Positive	Positive
18	4030	Negative	Positive	Positive	Positive
18	4044	Negative	Positive	Positive	Positive
18	4075	Negative	Positive	Negative	Positive
19	1133	Negative	Negative	Negative	Negative
19	3302	Negative	Negative	Negative	Negative
19	4054	Negative	Negative	Positive	Positive
19	4105	Positive	Positive	Negative	Positive
19	4120	Negative	Negative	Positive	Positive
19	4193	Negative	Negative	Negative	Negative
19	5091	Negative	Negative	Negative	Negative
19	5144	Negative	Negative	Positive	Positive
19	5185	Negative	Negative	Positive	Positive
19	6158	Negative	Negative	Negative	Negative

## Sheet: Table S4
*Breed			ELISA -			PCR-				ELISA -			PCR+				ELISA +			PCR+				ELISA +			PCR-
1	Navarra		Flock	Breed	Sample	ELISA#1	qPCR	TMEM154		Flock	Breed	Samples	ELISA#1	qPCR	TMEM154		Flock	Breed	Samples	ELISA#1	qPCR	TMEM154		Flock	Breed	Samples	ELISA#1	qPCR	TMEM154
2	Latxa		5	2	2	0	0	2		5	2	17	0	1	1		5	2	57	1	1	1		5	2	41	1	0	1
3	Assaf		5	2	4	0	0	1		5	2	96	0	1	1		1	1	118	1	1	1		5	2	67	1	0	2
4	Aragonesa		5	2	19	0	0	1		5	2	90	0	1	2		5	2	39	1	1	1		5	2	84	1	0	1
5	Churra		5	2	20	0	0	1		5	2	3	0	1	1		2	1	11	1	1	2		5	2	141	1	0	1
6	Lacaune		5	2	23	0	0	1		1	1	83	0	1	1		4	2	33	1	1	1		4	2	2	1	0	1
			5	2	25	0	0	1		5	2	45	0	1	1		1	1	35	1	1	1		4	2	11	1	0	2
** TMEM154			5	2	31	0	0	1		1	1	92	0	1	1		1	1	105	1	1	1		4	2	42	1	0	1
1	Allele KK		5	2	33	0	0	2		1	1	91	0	1	2		4	2	100	1	1	2		4	2	54	1	0	2
2	Allele EK or EE		5	2	34	0	0	1		4	2	41	0	1	2		4	2	198	1	1	2		4	2	67	1	0	1
			5	2	46	0	0	2		1	1	87	0	1	1		4	2	143	1	1	1		4	2	74	1	0	1
***ELISA and qPCR			5	2	53	0	0	1		4	2	14	0	1	1		6	3	15	1	1	2		4	2	80	1	0	2
0	negative		5	2	54	0	0	2		1	1	82	0	1	1		6	3	12	1	1	2		4	2	82	1	0	2
1	positive		5	2	55	0	0	1		1	1	94	0	1	2		4	2	217	1	1	2		4	2	83	1	0	2
			5	2	62	0	0	1		1	1	86	0	1	1		4	2	51	1	1	1		4	2	88	1	0	2
			5	2	92	0	0	1		5	2	5	0	1	1		2	1	17	1	1	1		4	2	89	1	0	1
			5	2	94	0	0	1		5	2	6	0	1	1		1	1	24	1	1	1		4	2	93	1	0	2
			5	2	95	0	0	1		4	2	126	0	1	1		3	3	32	1	1	1		4	2	94	1	0	1
			5	2	97	0	0	2		5	2	126	0	1	2		1	1	108	1	1	1		4	2	98	1	0	1
			5	2	98	0	0	1		5	2	120	0	1	1		7	3	26	1	1	2		4	2	101	1	0	1
			5	2	106	0	0	1		4	2	206	0	1	2		17	5	2057	1	1	1		4	2	109	1	0	1
			5	2	107	0	0	1		5	2	32	0	1	1		5	2	65	1	1	1		4	2	116	1	0	1
			5	2	108	0	0	2		5	2	60	0	1	2		5	2	83	1	1	1		4	2	117	1	0	2
			5	2	109	0	0	1		1	1	120	0	1	1		7	3	30	1	1	2		4	2	123	1	0	1
			5	2	112	0	0	2		1	1	104	0	1	1		4	2	195	1	1	1		4	2	127	1	0	2
			5	2	113	0	0	1		5	2	123	0	1	2		5	2	87	1	1	1		4	2	130	1	0	2
			5	2	114	0	0	2		5	2	140	0	1	1		2	1	32	1	1	1		4	2	131	1	0	2
			5	2	115	0	0	1		5	2	131	0	1	2		1	1	85	1	1	1		4	2	134	1	0	1
			5	2	121	0	0	1		5	2	101	0	1	1		8	3	32	1	1	2		4	2	136	1	0	2
			5	2	124	0	0	1		5	2	104	0	1	2		3	3	23	1	1	2		4	2	140	1	0	1
			5	2	125	0	0	1		5	2	110	0	1	1		3	3	35	1	1	1		4	2	144	1	0	1
			5	2	129	0	0	1		1	1	107	0	1	1		5	2	77	1	1	1		4	2	197	1	0	1
			5	2	135	0	0	2		5	2	35	0	1	1		8	3	42	1	1	2		4	2	210	1	0	2
			5	2	136	0	0	1		1	1	96	0	1	1		3	3	17	1	1	2		2	1	16	1	0	1
			5	2	139	0	0	1		5	2	105	0	1	1		3	3	33	1	1	2		2	1	18	1	0	1
			5	2	159	0	0	1		4	2	35	0	1	2		3	3	30	1	1	1		2	1	25	1	0	1
			5	2	220	0	0	1		4	2	37	0	1	1		8	3	39	1	1	1		2	1	38	1	0	2
			5	2	223	0	0	1		4	2	45	0	1	2		3	3	27	1	1	2		2	1	40	1	0	1
			5	2	224	0	0	2		5	2	61	0	1	1		4	2	188	1	1	1		1	1	121	1	0	1
			4	2	1	0	0	2		5	2	138	0	1	1		8	3	47	1	1	2		1	1	130	1	0	1
			4	2	4	0	0	1		4	2	21	0	1	1		4	2	25	1	1	2		1	1	166	1	0	1
			4	2	5	0	0	1		5	2	63	0	1	1		4	2	191	1	1	2		1	1	183	1	0	1
			4	2	6	0	0	1		5	2	127	0	1	1		4	2	218	1	1	2		1	1	187	1	0	1
			4	2	7	0	0	1		5	2	128	0	1	2		17	5	4058	1	1	1		1	1	212	1	0	2
			4	2	8	0	0	1		1	1	98	0	1	1		2	1	36	1	1	2		1	1	216	1	0	2
			4	2	9	0	0	1		5	2	30	0	1	1		4	2	387	1	1	2		1	1	217	1	0	1
			4	2	10	0	0	1		1	1	68	0	1	1		4	2	193	1	1	2		1	1	227	1	0	1
			4	2	12	0	0	1		1	1	97	0	1	1		3	3	2	1	1	1		1	1	232	1	0	1
			4	2	13	0	0	1		19	5	5185	0	1	1		3	3	1	1	1	2		3	3	18	1	0	2
			4	2	15	0	0	1		4	2	24	0	1	1		8	3	44	1	1	2		6	3	1	1	0	2
			4	2	16	0	0	1		4	2	208	0	1	1		3	3	3	1	1	2		6	3	2	1	0	2
			4	2	20	0	0	1		1	1	79	0	1	2		8	3	48	1	1	2		6	3	3	1	0	2
			4	2	22	0	0	1		5	2	27	0	1	1		4	2	43	1	1	1		6	3	5	1	0	2
			4	2	26	0	0	2		5	2	15	0	1	1		3	3	19	1	1	1		6	3	6	1	0	2
			4	2	34	0	0	2		5	2	22	0	1	1		8	3	45	1	1	2		6	3	11	1	0	2
			4	2	36	0	0	1		4	2	48	0	1	1		1	1	210	1	1	2		7	3	25	1	0	1
			4	2	39	0	0	1		1	1	67	0	1	1		13	5	14053	1	1	1		7	3	27	1	0	2
			4	2	40	0	0	1		5	2	133	0	1	2		13	5	11070	1	1	1		7	3	28	1	0	2
			4	2	46	0	0	1		1	1	101	0	1	1		17	5	4087	1	1	1		8	3	50	1	0	1
			4	2	49	0	0	1		1	1	100	0	1	1		5	2	137	1	1	1		10	5	6430	1	0	1
			4	2	50	0	0	1		1	1	99	0	1	1		4	2	384	1	1	2		11	5	16179	1	0	1
			4	2	52	0	0	1		4	2	23	0	1	1		8	3	43	1	1	2		11	5	16252	1	0	2
			4	2	72	0	0	2		4	2	184	0	1	1		4	2	30	1	1	1		14	5	458	1	0	1
			4	2	77	0	0	2		5	2	111	0	1	1		8	3	40	1	1	1		15	5	1014	1	0	1
			4	2	92	0	0	2		4	2	44	0	1	1		7	3	20	1	1	2		15	5	14054	1	0	2
			4	2	103	0	0	2		4	2	177	0	1	1		3	3	26	1	1	2		17	5	2190	1	0	1
			4	2	111	0	0	1		7	3	24	0	1	2		4	2	120	1	1	1		17	5	3070	1	0	1
			4	2	121	0	0	1		4	2	185	0	1	1		8	3	37	1	1	1		17	5	4117	1	0	1
			4	2	145	0	0	1		1	1	167	0	1	1		4	2	382	1	1	2		17	5	3008	1	0	2
			4	2	194	0	0	1		6	3	17	0	1	1		6	3	16	1	1	2		19	5	4105	1	0	2
			4	2	383	0	0	1		1	1	66	0	1	1		4	2	19	1	1	1
			2	1	1	0	0	2		5	2	134	0	1	1		4	2	381	1	1	1
			2	1	2	0	0	1		5	2	122	0	1	2		3	3	34	1	1	2
			2	1	3	0	0	1									17	5	2043	1	1	2
			2	1	5	0	0	1									6	3	10	1	1	2
			2	1	6	0	0	1									5	2	14	1	1	1
			2	1	7	0	0	2									8	3	38	1	1	2
			2	1	8	0	0	1									13	5	15015	1	1	1
			2	1	9	0	0	1									5	2	24	1	1	1
			2	1	10	0	0	1									13	5	16045	1	1	1
			2	1	14	0	0	1									7	3	19	1	1	2
			2	1	15	0	0	1									8	3	41	1	1	2
			2	1	20	0	0	1									4	2	79	1	1	2
			2	1	21	0	0	1									8	3	36	1	1	2
			2	1	22	0	0	1									4	2	186	1	1	1
			2	1	23	0	0	2									11	5	14557	1	1	2
			2	1	24	0	0	1									3	3	6	1	1	2
			2	1	26	0	0	2									4	2	47	1	1	1
			2	1	27	0	0	2									8	3	35	1	1	2
			2	1	28	0	0	1									7	3	23	1	1	2
			2	1	29	0	0	1									2	1	19	1	1	1
			2	1	30	0	0	2									4	2	71	1	1	2
			2	1	31	0	0	1									4	2	122	1	1	2
			2	1	34	0	0	2									6	3	4	1	1	2
			2	1	35	0	0	2									17	5	4031	1	1	1
			2	1	37	0	0	2									13	5	14004	1	1	2
			2	1	41	0	0	1									8	3	31	1	1	2
			1	1	1	0	0	1									4	2	115	1	1	2
			1	1	4	0	0	1									13	5	16020	1	1	1
			1	1	7	0	0	1									4	2	3	1	1	2
			1	1	75	0	0	1									13	5	14045	1	1	1
			1	1	76	0	0	1									11	5	15925	1	1	2
			1	1	77	0	0	1									8	3	33	1	1	2
			1	1	80	0	0	1									6	3	18	1	1	1
			1	1	84	0	0	1									3	3	28	1	1	2
			1	1	88	0	0	1									5	2	1	1	1	1
			1	1	89	0	0	1									8	3	34	1	1	2
			1	1	90	0	0	1									8	3	49	1	1	2
			1	1	93	0	0	1									3	3	41	1	1	2
			1	1	95	0	0	1									17	5	2027	1	1	2
			1	1	106	0	0	1									3	3	24	1	1	2
			1	1	113	0	0	1									8	3	46	1	1	2
			1	1	114	0	0	1									7	3	21	1	1	2
			1	1	119	0	0	1									3	3	29	1	1	2
			1	1	138	0	0	2									13	5	11030	1	1	1
			1	1	141	0	0	1									17	5	5069	1	1	1
			1	1	146	0	0	1									6	3	13	1	1	1
			1	1	163	0	0	1									3	3	22	1	1	2
			1	1	164	0	0	1									4	2	55	1	1	2
			1	1	165	0	0	2									3	3	39	1	1	2
			1	1	168	0	0	1									4	2	118	1	1	1
			1	1	171	0	0	2									3	3	20	1	1	1
			1	1	172	0	0	1									4	2	113	1	1	2
			1	1	196	0	0	1									4	2	90	1	1	2
			1	1	197	0	0	1									3	3	4	1	1	2
			1	1	218	0	0	1									4	2	75	1	1	1
			1	1	219	0	0	1									3	3	5	1	1	2
			1	1	220	0	0	2
			1	1	228	0	0	1
			1	1	229	0	0	1
			1	1	231	0	0	1
			1	1	233	0	0	1
			1	1	234	0	0	1
			1	1	237	0	0	1
			6	3	7	0	0	2
			6	3	8	0	0	2
			6	3	9	0	0	2
			6	3	14	0	0	1
			7	3	22	0	0	2
			7	3	29	0	0	2
			10	5	15306	0	0	2
			10	5	6008	0	0	1
			10	5	6022	0	0	2
			10	5	16197	0	0	1
			10	5	16282	0	0	1
			11	5	14485	0	0	2
			11	5	14596	0	0	1
			12	5	11007	0	0	1
			12	5	13038	0	0	1
			12	5	13125	0	0	1
			12	5	13163	0	0	1
			12	5	13184	0	0	1
			12	5	14030	0	0	1
			12	5	14081	0	0	1
			12	5	14219	0	0	1
			12	5	15082	0	0	1
			13	5	15032	0	0	2
			13	5	16044	0	0	1
			14	5	428	0	0	1
			14	5	431	0	0	2
			14	5	444	0	0	1
			14	5	375	0	0	1
			14	5	433	0	0	2
			14	5	391	0	0	2
			14	5	471	0	0	1
			14	5	424	0	0	1
			14	5	425	0	0	2
			15	5	13001	0	0	1
			15	5	13012	0	0	1
			15	5	13023	0	0	1
			15	5	14005	0	0	1
			15	5	14063	0	0	1
			15	5	16036	0	0	2
			16	5	9089	0	0	1
			16	5	9140	0	0	1
			16	5	9141	0	0	2
			16	5	9148	0	0	2
			18	5	6	0	0	1
			18	5	59	0	0	1
			18	5	2037	0	0	1
			18	5	2076	0	0	1
			18	5	3066	0	0	1
			18	5	3072	0	0	1
			18	5	4044	0	0	1
			18	5	4075	0	0	1
			19	5	1133	0	0	1
			19	5	3302	0	0	1
			19	5	4054	0	0	1
			19	5	4120	0	0	1
			19	5	4193	0	0	1
			19	5	5091	0	0	2
			19	5	5144	0	0	1
			19	5	6158	0	0	1

## Sheet: Table S5
*Breed			ELISA -			PCR-				ELISA -			PCR+				ELISA +			PCR+				ELISA +			PCR-
1	Navarra		Flock	Breed	Sample	ELISA#2	qPCR	TMEM154		Flock	Breed	Sample	ELISA#2	qPCR	TMEM154		Flock	Breed	Sample	ELISA#2	qPCR	TMEM154		Flock	Breed	Sample	ELISA#2	qPCR	TMEM154
2	Latxa		5	2	2	0	0	2		4	2	51	0	1	1		4	2	33	1	1	1		5	2	20	1	0	1
3	Assaf		5	2	4	0	0	1		4	2	100	0	1	2		1	1	35	1	1	1		5	2	54	1	0	2
4	Aragonesa		5	2	19	0	0	1		1	1	82	0	1	1		4	2	198	1	1	2		4	2	11	1	0	2
5	Churra		5	2	23	0	0	1		5	2	1	0	1	1		4	2	143	1	1	1		4	2	42	1	0	1
6	Lacaune		5	2	25	0	0	1		5	2	3	0	1	1		6	3	15	1	1	2		4	2	54	1	0	2
			5	2	31	0	0	1		5	2	5	0	1	1		6	3	12	1	1	2		4	2	67	1	0	1
** TMEM154			5	2	33	0	0	2		5	2	6	0	1	1		4	2	217	1	1	2		4	2	80	1	0	2
1	Allele KK		5	2	34	0	0	1		5	2	14	0	1	1		2	1	17	1	1	1		4	2	82	1	0	2
2	Allele EK or EE		5	2	41	0	0	1		5	2	15	0	1	1		7	3	26	1	1	2		4	2	83	1	0	2
			5	2	46	0	0	2		5	2	17	0	1	1		17	5	2057	1	1	1		4	2	88	1	0	2
***ELISA and qPCR			5	2	53	0	0	1		5	2	22	0	1	1		7	3	30	1	1	2		4	2	89	1	0	1
0	negative		5	2	55	0	0	1		5	2	24	0	1	1		8	3	32	1	1	2		4	2	93	1	0	2
1	positive		5	2	62	0	0	1		5	2	30	0	1	1		3	3	23	1	1	2		4	2	94	1	0	1
			5	2	67	0	0	2		5	2	32	0	1	1		8	3	42	1	1	2		4	2	98	1	0	1
			5	2	84	0	0	1		5	2	35	0	1	1		3	3	17	1	1	2		4	2	101	1	0	1
			5	2	92	0	0	1		5	2	39	0	1	1		4	2	35	1	1	2		4	2	109	1	0	1
			5	2	94	0	0	1		5	2	45	0	1	1		4	2	37	1	1	1		4	2	116	1	0	1
			5	2	95	0	0	1		5	2	57	0	1	1		8	3	39	1	1	1		4	2	123	1	0	1
			5	2	97	0	0	2		5	2	60	0	1	2		8	3	47	1	1	2		4	2	127	1	0	2
			5	2	98	0	0	1		5	2	61	0	1	1		4	2	25	1	1	2		4	2	130	1	0	2
			5	2	106	0	0	1		5	2	63	0	1	1		4	2	191	1	1	2		4	2	131	1	0	2
			5	2	107	0	0	1		5	2	65	0	1	1		4	2	218	1	1	2		4	2	134	1	0	1
			5	2	108	0	0	2		5	2	77	0	1	1		17	5	4058	1	1	1		4	2	136	1	0	2
			5	2	109	0	0	1		5	2	83	0	1	1		2	1	36	1	1	2		4	2	140	1	0	1
			5	2	112	0	0	2		5	2	87	0	1	1		4	2	387	1	1	2		4	2	144	1	0	1
			5	2	113	0	0	1		5	2	90	0	1	2		4	2	193	1	1	2		4	2	145	1	0	1
			5	2	114	0	0	2		5	2	96	0	1	1		3	3	2	1	1	1		4	2	194	1	0	1
			5	2	115	0	0	1		5	2	101	0	1	1		3	3	1	1	1	2		4	2	197	1	0	1
			5	2	121	0	0	1		5	2	104	0	1	2		8	3	44	1	1	2		4	2	210	1	0	2
			5	2	124	0	0	1		5	2	105	0	1	1		3	3	3	1	1	2		2	1	3	1	0	1
			5	2	125	0	0	1		5	2	110	0	1	1		8	3	48	1	1	2		2	1	6	1	0	1
			5	2	129	0	0	1		5	2	111	0	1	1		4	2	43	1	1	1		2	1	7	1	0	2
			5	2	135	0	0	2		5	2	120	0	1	1		3	3	19	1	1	1		2	1	10	1	0	1
			5	2	136	0	0	1		5	2	122	0	1	2		8	3	45	1	1	2		2	1	16	1	0	1
			5	2	139	0	0	1		5	2	123	0	1	2		5	2	27	1	1	1		2	1	18	1	0	1
			5	2	141	0	0	1		5	2	126	0	1	2		1	1	210	1	1	2		2	1	23	1	0	2
			5	2	159	0	0	1		5	2	127	0	1	1		13	5	14053	1	1	1		2	1	24	1	0	1
			5	2	220	0	0	1		5	2	128	0	1	2		13	5	11070	1	1	1		2	1	25	1	0	1
			5	2	223	0	0	1		5	2	131	0	1	2		17	5	4087	1	1	1		2	1	26	1	0	2
			5	2	224	0	0	2		5	2	133	0	1	2		4	2	384	1	1	2		2	1	27	1	0	2
			4	2	1	0	0	2		5	2	134	0	1	1		8	3	43	1	1	2		2	1	28	1	0	1
			4	2	2	0	0	1		5	2	137	0	1	1		4	2	30	1	1	1		2	1	29	1	0	1
			4	2	4	0	0	1		5	2	138	0	1	1		8	3	40	1	1	1		2	1	30	1	0	2
			4	2	5	0	0	1		5	2	140	0	1	1		7	3	20	1	1	2		2	1	38	1	0	2
			4	2	6	0	0	1		4	2	14	0	1	1		3	3	26	1	1	2		2	1	40	1	0	1
			4	2	7	0	0	1		4	2	21	0	1	1		4	2	120	1	1	1		1	1	130	1	0	1
			4	2	8	0	0	1		4	2	23	0	1	1		8	3	37	1	1	1		1	1	166	1	0	1
			4	2	9	0	0	1		4	2	24	0	1	1		4	2	382	1	1	2		1	1	212	1	0	2
			4	2	10	0	0	1		4	2	41	0	1	2		6	3	16	1	1	2		1	1	216	1	0	2
			4	2	12	0	0	1		4	2	44	0	1	1		4	2	19	1	1	1		3	3	18	1	0	2
			4	2	13	0	0	1		4	2	45	0	1	2		4	2	381	1	1	1		6	3	1	1	0	2
			4	2	15	0	0	1		4	2	48	0	1	1		17	5	2043	1	1	2		6	3	2	1	0	2
			4	2	16	0	0	1		4	2	126	0	1	1		6	3	10	1	1	2		6	3	3	1	0	2
			4	2	20	0	0	1		4	2	177	0	1	1		8	3	38	1	1	2		6	3	5	1	0	2
			4	2	22	0	0	1		4	2	184	0	1	1		13	5	15015	1	1	1		6	3	6	1	0	2
			4	2	26	0	0	2		4	2	185	0	1	1		13	5	16045	1	1	1		6	3	11	1	0	2
			4	2	34	0	0	2		4	2	188	0	1	1		7	3	19	1	1	2		7	3	22	1	0	2
			4	2	36	0	0	1		4	2	195	0	1	1		8	3	41	1	1	2		7	3	25	1	0	1
			4	2	39	0	0	1		4	2	206	0	1	2		4	2	79	1	1	2		7	3	27	1	0	2
			4	2	40	0	0	1		4	2	208	0	1	1		8	3	36	1	1	2		7	3	28	1	0	2
			4	2	46	0	0	1		2	1	11	0	1	2		4	2	186	1	1	1		7	3	29	1	0	2
			4	2	49	0	0	1		2	1	32	0	1	1		11	5	14557	1	1	2		8	3	50	1	0	1
			4	2	50	0	0	1		1	1	24	0	1	1		3	3	6	1	1	2		10	5	6022	1	0	2
			4	2	52	0	0	1		1	1	67	0	1	1		4	2	47	1	1	1		11	5	16252	1	0	2
			4	2	72	0	0	2		1	1	68	0	1	1		8	3	35	1	1	2		13	5	15032	1	0	2
			4	2	74	0	0	1		1	1	79	0	1	2		7	3	23	1	1	2		14	5	375	1	0	1
			4	2	77	0	0	2		1	1	83	0	1	1		2	1	19	1	1	1		15	5	14054	1	0	2
			4	2	92	0	0	2		1	1	85	0	1	1		4	2	71	1	1	2		16	5	9089	1	0	1
			4	2	103	0	0	2		1	1	86	0	1	1		4	2	122	1	1	2		16	5	9141	1	0	2
			4	2	111	0	0	1		1	1	87	0	1	1		6	3	4	1	1	2		16	5	9148	1	0	2
			4	2	117	0	0	2		1	1	91	0	1	2		17	5	4031	1	1	1		17	5	2190	1	0	1
			4	2	121	0	0	1		1	1	92	0	1	1		13	5	14004	1	1	2		17	5	3070	1	0	1
			4	2	383	0	0	1		1	1	94	0	1	2		8	3	31	1	1	2		17	5	4117	1	0	1
			2	1	1	0	0	2		1	1	96	0	1	1		4	2	115	1	1	2		17	5	3008	1	0	2
			2	1	2	0	0	1		1	1	97	0	1	1		13	5	16020	1	1	1		18	5	3072	1	0	1
			2	1	5	0	0	1		1	1	98	0	1	1		4	2	3	1	1	2		18	5	4044	1	0	1
			2	1	8	0	0	1		1	1	99	0	1	1		13	5	14045	1	1	1		18	5	4075	1	0	1
			2	1	9	0	0	1		1	1	100	0	1	1		11	5	15925	1	1	2		19	5	4105	1	0	2
			2	1	14	0	0	1		1	1	101	0	1	1		8	3	33	1	1	2
			2	1	15	0	0	1		1	1	104	0	1	1		6	3	17	1	1	1
			2	1	20	0	0	1		1	1	105	0	1	1		6	3	18	1	1	1
			2	1	21	0	0	1		1	1	107	0	1	1		3	3	28	1	1	2
			2	1	22	0	0	1		1	1	108	0	1	1		8	3	34	1	1	2
			2	1	31	0	0	1		1	1	118	0	1	1		8	3	49	1	1	2
			2	1	34	0	0	2		1	1	120	0	1	1		3	3	41	1	1	2
			2	1	35	0	0	2		1	1	167	0	1	1		17	5	2027	1	1	2
			2	1	37	0	0	2		3	3	27	0	1	2		3	3	24	1	1	2
			2	1	41	0	0	1		3	3	29	0	1	2		8	3	46	1	1	2
			1	1	1	0	0	1		3	3	30	0	1	1		7	3	21	1	1	2
			1	1	4	0	0	1		3	3	32	0	1	1		13	5	11030	1	1	1
			1	1	7	0	0	1		3	3	33	0	1	2		17	5	5069	1	1	1
			1	1	75	0	0	1		3	3	34	0	1	2		6	3	13	1	1	1
			1	1	76	0	0	1		3	3	35	0	1	1		3	3	22	1	1	2
			1	1	77	0	0	1		3	3	39	0	1	2		1	1	66	1	1	1
			1	1	80	0	0	1		7	3	24	0	1	2		4	2	55	1	1	2
			1	1	84	0	0	1		19	5	5185	0	1	1		4	2	118	1	1	1
			1	1	88	0	0	1									3	3	20	1	1	1
			1	1	89	0	0	1									4	2	113	1	1	2
			1	1	90	0	0	1									4	2	90	1	1	2
			1	1	93	0	0	1									3	3	4	1	1	2
			1	1	95	0	0	1									4	2	75	1	1	1
			1	1	106	0	0	1									3	3	5	1	1	2
			1	1	113	0	0	1
			1	1	114	0	0	1
			1	1	119	0	0	1
			1	1	121	0	0	1
			1	1	138	0	0	2
			1	1	141	0	0	1
			1	1	146	0	0	1
			1	1	163	0	0	1
			1	1	164	0	0	1
			1	1	165	0	0	2
			1	1	168	0	0	1
			1	1	171	0	0	2
			1	1	172	0	0	1
			1	1	183	0	0	1
			1	1	187	0	0	1
			1	1	196	0	0	1
			1	1	197	0	0	1
			1	1	217	0	0	1
			1	1	218	0	0	1
			1	1	219	0	0	1
			1	1	220	0	0	2
			1	1	227	0	0	1
			1	1	228	0	0	1
			1	1	229	0	0	1
			1	1	231	0	0	1
			1	1	232	0	0	1
			1	1	233	0	0	1
			1	1	234	0	0	1
			1	1	237	0	0	1
			6	3	7	0	0	2
			6	3	8	0	0	2
			6	3	9	0	0	2
			6	3	14	0	0	1
			10	5	15306	0	0	2
			10	5	6008	0	0	1
			10	5	16197	0	0	1
			10	5	16282	0	0	1
			10	5	6430	0	0	1
			11	5	14485	0	0	2
			11	5	14596	0	0	1
			11	5	16179	0	0	1
			12	5	11007	0	0	1
			12	5	13038	0	0	1
			12	5	13125	0	0	1
			12	5	13163	0	0	1
			12	5	13184	0	0	1
			12	5	14030	0	0	1
			12	5	14081	0	0	1
			12	5	14219	0	0	1
			12	5	15082	0	0	1
			13	5	16044	0	0	1
			14	5	428	0	0	1
			14	5	431	0	0	2
			14	5	444	0	0	1
			14	5	433	0	0	2
			14	5	391	0	0	2
			14	5	471	0	0	1
			14	5	458	0	0	1
			14	5	424	0	0	1
			14	5	425	0	0	2
			15	5	1014	0	0	1
			15	5	13001	0	0	1
			15	5	13012	0	0	1
			15	5	13023	0	0	1
			15	5	14005	0	0	1
			15	5	14063	0	0	1
			15	5	16036	0	0	2
			16	5	9140	0	0	1
			18	5	6	0	0	1
			18	5	59	0	0	1
			18	5	2037	0	0	1
			18	5	2076	0	0	1
			18	5	3066	0	0	1
			19	5	1133	0	0	1
			19	5	3302	0	0	1
			19	5	4054	0	0	1
			19	5	4120	0	0	1
			19	5	4193	0	0	1
			19	5	5091	0	0	2
			19	5	5144	0	0	1
			19	5	6158	0	0	1

## Sheet: Table S6
*Breed			ELISA -			PCR-				ELISA -			PCR+				ELISA +			PCR+				ELISA +			PCR-
1	Raza Navarra		Flock	Breed	Sample	ELISA#3	qPCR	TMEM154		Flock	Breed	Sample	ELISA#3	qPCR	TMEM154		Flock	Breed	Sample	ELISA#3	qPCR	TMEM154		Flock	Breed	Sample	ELISA#3	qPCR	TMEM154
2	Latxa Navarra		5	2	2	0	0	2		5	2	17	0	1	1		5	2	90	1	1	2		5	2	25	1	0	1
3	Assaf		5	2	4	0	0	1		5	2	39	0	1	1		4	2	126	1	1	1		5	2	55	1	0	1
4	Rasa Aragonesa		5	2	19	0	0	1		5	2	57	0	1	1		4	2	206	1	1	2		5	2	92	1	0	1
5	Churra		5	2	20	0	0	1		5	2	96	0	1	1		5	2	15	1	1	1		5	2	97	1	0	2
6	Lacaune		5	2	23	0	0	1		5	2	140	0	1	1		5	2	35	1	1	1		5	2	115	1	0	1
			5	2	31	0	0	1		4	2	51	0	1	1		5	2	45	1	1	1		5	2	159	1	0	1
** TMEM154			5	2	33	0	0	2		4	2	100	0	1	2		5	2	101	1	1	1		5	2	223	1	0	1
1	Allele KK		5	2	34	0	0	1		4	2	120	0	1	1		4	2	3	1	1	2		4	2	39	1	0	1
2	Allele EK or EE		5	2	41	0	0	1		4	2	122	0	1	1		4	2	19	1	1	1		4	2	42	1	0	1
			5	2	46	0	0	2		1	1	82	0	1	1		4	2	25	1	1	2		4	2	54	1	0	2
***ELISA and qPCR			5	2	53	0	0	1		5	2	1	0	1	1		4	2	33	1	1	1		4	2	67	1	0	1
0	negative		5	2	54	0	0	2		5	2	3	0	1	1		4	2	35	1	1	2		4	2	80	1	0	2
1	positive		5	2	62	0	0	1		5	2	5	0	1	1		4	2	37	1	1	1		4	2	82	1	0	2
			5	2	67	0	0	2		5	2	6	0	1	1		4	2	43	1	1	1		4	2	93	1	0	2
			5	2	84	0	0	1		5	2	14	0	1	1		4	2	44	1	1	1		4	2	94	1	0	1
			5	2	94	0	0	1		5	2	22	0	1	1		4	2	45	1	1	2		4	2	101	1	0	1
			5	2	95	0	0	1		5	2	24	0	1	1		4	2	47	1	1	1		4	2	134	1	0	1
			5	2	98	0	0	1		5	2	27	0	1	1		4	2	48	1	1	1		4	2	144	1	0	1
			5	2	106	0	0	1		5	2	30	0	1	1		4	2	55	1	1	2		4	2	194	1	0	1
			5	2	107	0	0	1		5	2	32	0	1	1		4	2	75	1	1	1		4	2	197	1	0	1
			5	2	108	0	0	2		5	2	60	0	1	2		4	2	79	1	1	2		4	2	210	1	0	2
			5	2	109	0	0	1		5	2	61	0	1	1		4	2	90	1	1	2		4	2	383	1	0	1
			5	2	112	0	0	2		5	2	63	0	1	1		4	2	113	1	1	2		2	1	38	1	0	2
			5	2	113	0	0	1		5	2	65	0	1	1		4	2	115	1	1	2		2	1	40	1	0	1
			5	2	114	0	0	2		5	2	77	0	1	1		4	2	118	1	1	1		1	1	75	1	0	1
			5	2	121	0	0	1		5	2	83	0	1	1		4	2	119	1	1	1		1	1	113	1	0	1
			5	2	124	0	0	1		5	2	87	0	1	1		4	2	121	1	1	1		1	1	114	1	0	1
			5	2	125	0	0	1		5	2	104	0	1	2		4	2	143	1	1	1		1	1	138	1	0	2
			5	2	129	0	0	1		5	2	105	0	1	1		4	2	185	1	1	1		1	1	146	1	0	1
			5	2	135	0	0	2		5	2	110	0	1	1		4	2	191	1	1	2		1	1	172	1	0	1
			5	2	136	0	0	1		5	2	111	0	1	1		4	2	193	1	1	2		1	1	196	1	0	1
			5	2	139	0	0	1		5	2	120	0	1	1		4	2	195	1	1	1		1	1	197	1	0	1
			5	2	141	0	0	1		5	2	122	0	1	2		4	2	198	1	1	2		1	1	212	1	0	2
			5	2	220	0	0	1		5	2	123	0	1	2		4	2	208	1	1	1		1	1	220	1	0	2
			5	2	224	0	0	2		5	2	126	0	1	2		4	2	217	1	1	2		1	1	229	1	0	1
			4	2	1	0	0	2		5	2	127	0	1	1		4	2	218	1	1	2		1	1	231	1	0	1
			4	2	2	0	0	1		5	2	128	0	1	2		4	2	381	1	1	1		1	1	237	1	0	1
			4	2	4	0	0	1		5	2	131	0	1	2		4	2	382	1	1	2		6	3	1	1	0	2
			4	2	5	0	0	1		5	2	133	0	1	2		2	1	36	1	1	2		6	3	2	1	0	2
			4	2	6	0	0	1		5	2	134	0	1	1		1	1	118	1	1	1		6	3	3	1	0	2
			4	2	7	0	0	1		5	2	137	0	1	1		1	1	167	1	1	1		6	3	5	1	0	2
			4	2	8	0	0	1		5	2	138	0	1	1		1	1	210	1	1	2		6	3	6	1	0	2
			4	2	9	0	0	1		4	2	14	0	1	1		3	3	20	1	1	1		6	3	7	1	0	2
			4	2	10	0	0	1		4	2	21	0	1	1		6	3	4	1	1	2		6	3	9	1	0	2
			4	2	11	0	0	2		4	2	23	0	1	1		6	3	10	1	1	2		6	3	11	1	0	2
			4	2	12	0	0	1		4	2	24	0	1	1		6	3	13	1	1	1		6	3	14	1	0	1
			4	2	13	0	0	1		4	2	30	0	1	1		6	3	15	1	1	2		7	3	22	1	0	2
			4	2	15	0	0	1		4	2	41	0	1	2		6	3	16	1	1	2		7	3	25	1	0	1
			4	2	16	0	0	1		4	2	71	0	1	2		6	3	17	1	1	1		7	3	27	1	0	2
			4	2	20	0	0	1		4	2	123	0	1	1		6	3	18	1	1	1		7	3	28	1	0	2
			4	2	22	0	0	1		4	2	177	0	1	1		7	3	19	1	1	2		8	3	50	1	0	1
			4	2	26	0	0	2		4	2	184	0	1	1		7	3	20	1	1	2		10	5	6022	1	0	2
			4	2	34	0	0	2		4	2	186	0	1	1		7	3	21	1	1	2		10	5	16197	1	0	1
			4	2	36	0	0	1		4	2	188	0	1	1		7	3	23	1	1	2		10	5	6430	1	0	1
			4	2	40	0	0	1		4	2	384	0	1	2		7	3	26	1	1	2		11	5	16179	1	0	1
			4	2	46	0	0	1		4	2	387	0	1	2		8	3	31	1	1	2		11	5	16252	1	0	2
			4	2	49	0	0	1		2	1	11	0	1	2		8	3	32	1	1	2		12	5	11007	1	0	1
			4	2	50	0	0	1		2	1	17	0	1	1		8	3	33	1	1	2		12	5	13038	1	0	1
			4	2	52	0	0	1		2	1	19	0	1	1		8	3	34	1	1	2		12	5	13125	1	0	1
			4	2	72	0	0	2		2	1	32	0	1	1		8	3	35	1	1	2		12	5	13184	1	0	1
			4	2	74	0	0	1		1	1	24	0	1	1		8	3	36	1	1	2		12	5	14081	1	0	1
			4	2	77	0	0	2		1	1	35	0	1	1		8	3	37	1	1	1		12	5	15082	1	0	1
			4	2	83	0	0	2		1	1	66	0	1	1		8	3	38	1	1	2		13	5	15032	1	0	2
			4	2	88	0	0	2		1	1	67	0	1	1		8	3	39	1	1	1		14	5	375	1	0	1
			4	2	89	0	0	1		1	1	68	0	1	1		8	3	40	1	1	1		14	5	391	1	0	2
			4	2	92	0	0	2		1	1	79	0	1	2		8	3	41	1	1	2		14	5	458	1	0	1
			4	2	98	0	0	1		1	1	83	0	1	1		8	3	42	1	1	2		14	5	424	1	0	1
			4	2	103	0	0	2		1	1	85	0	1	1		8	3	43	1	1	2		14	5	425	1	0	2
			4	2	109	0	0	1		1	1	86	0	1	1		8	3	44	1	1	2		15	5	13001	1	0	1
			4	2	111	0	0	1		1	1	87	0	1	1		8	3	45	1	1	2		15	5	13012	1	0	1
			4	2	116	0	0	1		1	1	91	0	1	2		8	3	46	1	1	2		15	5	14054	1	0	2
			4	2	117	0	0	2		1	1	92	0	1	1		8	3	47	1	1	2		15	5	16036	1	0	2
			4	2	127	0	0	2		1	1	94	0	1	2		8	3	48	1	1	2		16	5	9148	1	0	2
			4	2	131	0	0	1		1	1	96	0	1	1		8	3	49	1	1	2		17	5	2190	1	0	1
			4	2	136	0	0	2		1	1	97	0	1	1		11	5	14557	1	1	2		17	5	3070	1	0	1
			4	2	140	0	0	1		1	1	98	0	1	1		11	5	15925	1	1	2		17	5	4117	1	0	1
			4	2	145	0	0	2		1	1	99	0	1	1		13	5	11030	1	1	1		17	5	3008	1	0	2
			2	1	1	0	0	2		1	1	100	0	1	1		13	5	11070	1	1	1		18	5	59	1	0	1
			2	1	2	0	0	1		1	1	101	0	1	1		13	5	14004	1	1	2		18	5	2037	1	0	1
			2	1	3	0	0	1		1	1	104	0	1	1		13	5	14045	1	1	1		18	5	3072	1	0	1
			2	1	5	0	0	1		1	1	105	0	1	1		13	5	14053	1	1	1		18	5	4044	1	0	1
			2	1	6	0	0	1		1	1	107	0	1	1		13	5	15015	1	1	1		19	5	4054	1	0	1
			2	1	7	0	0	2		1	1	108	0	1	1		13	5	16020	1	1	1		19	5	4120	1	0	1
			2	1	8	0	0	1		1	1	120	0	1	1		13	5	16045	1	1	1		19	5	5144	1	0	1
			2	1	9	0	0	1		3	3	1	0	1	2		17	5	2027	1	1	2
			2	1	10	0	0	1		3	3	2	0	1	1		17	5	2043	1	1	2
			2	1	14	0	0	1		3	3	3	0	1	2		17	5	2057	1	1	1
			2	1	15	0	0	1		3	3	4	0	1	2		17	5	4031	1	1	1
			2	1	16	0	0	1		3	3	5	0	1	2		17	5	4087	1	1	1
			2	1	18	0	0	1		3	3	6	0	1	2		17	5	4058	1	1	1
			2	1	20	0	0	1		3	3	17	0	1	2		17	5	5069	1	1	1
			2	1	21	0	0	1		3	3	19	0	1	1		19	5	5185	1	1	1
			2	1	22	0	0	1		3	3	22	0	1	2
			2	1	23	0	0	2		3	3	23	0	1	2
			2	1	24	0	0	1		3	3	24	0	1	2
			2	1	25	0	0	1		3	3	26	0	1	2
			2	1	26	0	0	2		3	3	27	0	1	2
			2	1	27	0	0	2		3	3	28	0	1	2
			2	1	28	0	0	1		3	3	29	0	1	2
			2	1	29	0	0	1		3	3	30	0	1	1
			2	1	30	0	0	2		3	3	32	0	1	1
			2	1	31	0	0	1		3	3	33	0	1	2
			2	1	34	0	0	2		3	3	34	0	1	2
			2	1	35	0	0	2		3	3	35	0	1	1
			2	1	37	0	0	2		3	3	39	0	1	2
			2	1	41	0	0	1		3	3	41	0	1	2
			1	1	1	0	0	1		6	3	12	0	1	2
			1	1	4	0	0	1		7	3	24	0	1	2
			1	1	7	0	0	1		7	3	30	0	1	2
			1	1	76	0	0	1
			1	1	77	0	0	1
			1	1	80	0	0	1
			1	1	84	0	0	1
			1	1	88	0	0	1
			1	1	89	0	0	1
			1	1	90	0	0	1
			1	1	93	0	0	1
			1	1	95	0	0	1
			1	1	106	0	0	1
			1	1	119	0	0	1
			1	1	121	0	0	1
			1	1	130	0	0	1
			1	1	141	0	0	1
			1	1	163	0	0	1
			1	1	164	0	0	1
			1	1	165	0	0	2
			1	1	166	0	0	1
			1	1	168	0	0	1
			1	1	171	0	0	2
			1	1	183	0	0	1
			1	1	187	0	0	1
			1	1	216	0	0	2
			1	1	217	0	0	1
			1	1	218	0	0	1
			1	1	219	0	0	1
			1	1	227	0	0	1
			1	1	228	0	0	1
			1	1	232	0	0	1
			1	1	233	0	0	1
			1	1	234	0	0	1
			3	3	18	0	0	2
			6	3	8	0	0	2
			7	3	29	0	0	2
			10	5	15306	0	0	2
			10	5	6008	0	0	1
			10	5	16282	0	0	1
			11	5	14485	0	0	2
			11	5	14596	0	0	1
			12	5	13163	0	0	1
			12	5	14030	0	0	1
			12	5	14219	0	0	1
			13	5	16044	0	0	1
			14	5	428	0	0	1
			14	5	431	0	0	2
			14	5	444	0	0	1
			14	5	433	0	0	2
			14	5	471	0	0	1
			15	5	1014	0	0	1
			15	5	13023	0	0	1
			15	5	14005	0	0	1
			15	5	14063	0	0	1
			16	5	9089	0	0	1
			16	5	9140	0	0	1
			16	5	9141	0	0	2
			18	5	6	0	0	1
			18	5	2076	0	0	1
			18	5	3066	0	0	1
			18	5	4075	0	0	1
			19	5	1133	0	0	1
			19	5	3302	0	0	1
			19	5	4105	0	0	2
			19	5	4193	0	0	1
			19	5	5091	0	0	2
			19	5	6158	0	0	1
